# Supplementary material
Source: MDPI journal article supplement (https://www.mdpi.com/2071-1050/12/10/4029)
Supplement: s1 [file s1]

# Questionnaire for Industrialized Construction Maturity

## Evaluation of Building Projects

Dear experts,

Thank you very much for taking the time to participate in this survey. We belong to the researchers of the National Engineering Technology Research Center for Prefabrication Construction in Civil Engineering (NETRC\_PCCE) of Tongji University, and we are currently conducting research work on "Maturity Evaluation of Industrial Construction of Construction Projects". There are no "correct" and "wrong" answers to all questions in the questionnaire. Based on your own experience and feelings in the construction industrialization practice, please give you the choice that best reflects the actual situation. The filling process is expected to take you about 20 minutes. Thank you for your participation!

We attach great importance to the strict confidentiality of your personal information and solemnly promise that the questionnaire will only be used for academic research.

Contact us : [victor-liu@outlook.com](mailto:victor-liu@outlook.com)

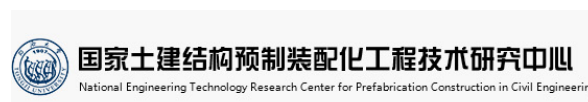

### 1. Introduction to the evaluation model

The maturity of industrial construction of a construction project refers to the ability level of the project to successfully and reliably implement the project using the technology related to industrial construction under predetermined goals and conditions. This study divides the evaluation indicators into two areas: “Enablers” and “Results”. “Enablers” describe what the project should do to achieve the goal, and “Results” describe the achievement of the project's goals, and **Figure 1** presents the evaluation dimensions that correspond to the following indicators.

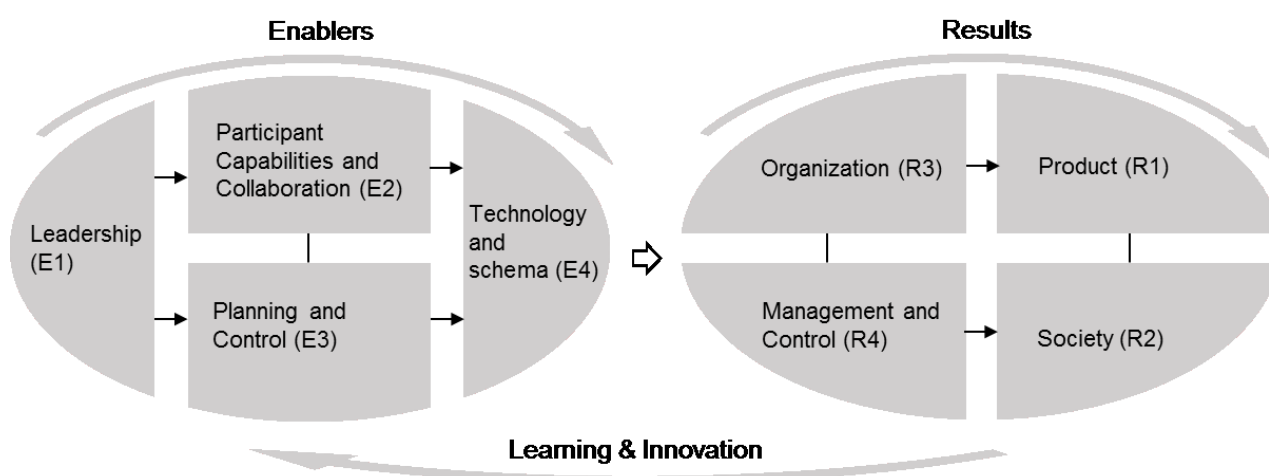

**Figure 1.** The framework for the evaluation model

## 2. Basic information about the project

Please fill the blanks of the table that best matches the actual situation of the project you are responsible for and mark the multiple choice questions in the appropriate ☐ with  $\checkmark$ .

|                                        |                                                                                                                                                                                                                                                                                                                                                                                                                                                                                                                                                                                                                                                                                                                                                                                                                                                                                                                                                      |
|----------------------------------------|------------------------------------------------------------------------------------------------------------------------------------------------------------------------------------------------------------------------------------------------------------------------------------------------------------------------------------------------------------------------------------------------------------------------------------------------------------------------------------------------------------------------------------------------------------------------------------------------------------------------------------------------------------------------------------------------------------------------------------------------------------------------------------------------------------------------------------------------------------------------------------------------------------------------------------------------------|
| Project name                           |                                                                                                                                                                                                                                                                                                                                                                                                                                                                                                                                                                                                                                                                                                                                                                                                                                                                                                                                                      |
| Which party do you belong to:          | <input type="checkbox"/> Owner; <input type="checkbox"/> Designer; <input type="checkbox"/> Construction contractor; <input type="checkbox"/> Subcontractor of the construction contractor; <input type="checkbox"/> Consultant/supervisor; <input type="checkbox"/> Component supplier; <input type="checkbox"/> Others:                                                                                                                                                                                                                                                                                                                                                                                                                                                                                                                                                                                                                            |
| Project investment situation           | Total investment (100 million yuan):<br>Construction and installation cost (yuan / m <sup>2</sup> ):<br>The estimated cost of construction and installation using traditional techniques (yuan/m <sup>2</sup> ):                                                                                                                                                                                                                                                                                                                                                                                                                                                                                                                                                                                                                                                                                                                                     |
| Project delivery method                | <input type="checkbox"/> DBB <input type="checkbox"/> DB <input type="checkbox"/> EPC <input type="checkbox"/> CM-at GC <input type="checkbox"/> Others:                                                                                                                                                                                                                                                                                                                                                                                                                                                                                                                                                                                                                                                                                                                                                                                             |
| The building area and number of floors | Building area (10,000 m <sup>2</sup> ):<br>The number of above-ground floors:<br>The number of underground floors:                                                                                                                                                                                                                                                                                                                                                                                                                                                                                                                                                                                                                                                                                                                                                                                                                                   |
| Project duration                       | Total duration (Day):<br>start date (y/m/d):<br>completion date (y/m/d):                                                                                                                                                                                                                                                                                                                                                                                                                                                                                                                                                                                                                                                                                                                                                                                                                                                                             |
| Prefabricated structural system        | <input type="checkbox"/> Prefabricated assembled shear wall structure; <input type="checkbox"/> In-situ structure external slab system; <input type="checkbox"/> Assembled frame external slab system; <input type="checkbox"/> Assembled shear wall system; <input type="checkbox"/> Stacked shear wall; <input type="checkbox"/> Others:                                                                                                                                                                                                                                                                                                                                                                                                                                                                                                                                                                                                           |
| Prefabricated components or parts      | Prefabricated components:<br><input type="checkbox"/> Beam; <input type="checkbox"/> Column; <input type="checkbox"/> Floor slab; <input type="checkbox"/> Floor slab; <input type="checkbox"/> External load-bearing wall panel; <input type="checkbox"/> Internal load-bearing wall panel; <input type="checkbox"/> External wall panel; <input type="checkbox"/> Internal partition wall panel; <input type="checkbox"/> Balcony panel or air-conditioning panel; <input type="checkbox"/> Stairs; <input type="checkbox"/> Daughter wall; <input type="checkbox"/> Other:<br><br>Prefabricated parts:<br><input type="checkbox"/> Exterior window <input type="checkbox"/> Integrated toilet <input type="checkbox"/> Whole cabinet <input type="checkbox"/> Storage room <input type="checkbox"/> Prefabricated pipe well <input type="checkbox"/> Pipeline system <input type="checkbox"/> Prefabricated flue <input type="checkbox"/> Others: |

## 3. “Enablers” area

Please tick the option on the right side of the table that best matches the actual situation of the project you are responsible for. Here evaluation scores from 1 to 5 stand for "extremely non-conformity", "unconformity", "uncertain", "reluctantly conformity", and "extremely conformity" respectively.

| Code | Indicators                     | Practical analysis elements                                                        | Your rating |   |   |   |   |
|------|--------------------------------|------------------------------------------------------------------------------------|-------------|---|---|---|---|
|      |                                |                                                                                    | 1           | 2 | 3 | 4 | 5 |
| E1.1 | Owner's cognition and attitude | Recognize and facilitate the application of industrial housing technology          |             |   |   |   |   |
|      |                                | Recognize and facilitate coordination and communication among all parties involved |             |   |   |   |   |

|             |                                                  |                                                                                                                                                                  |                                                                                                                               |  |  |  |  |
|-------------|--------------------------------------------------|------------------------------------------------------------------------------------------------------------------------------------------------------------------|-------------------------------------------------------------------------------------------------------------------------------|--|--|--|--|
|             |                                                  | Establish a work performance system for industrialized construction projects                                                                                     |                                                                                                                               |  |  |  |  |
| <b>E1.2</b> | Contractors' cognition and attitude              | Recognize and are willing to change the traditional way of working                                                                                               |                                                                                                                               |  |  |  |  |
|             |                                                  | Establish a work performance system for industrial housing projects                                                                                              |                                                                                                                               |  |  |  |  |
| <b>E2.1</b> | Designer's experience and ability                | Has a good reputation and industry qualifications                                                                                                                |                                                                                                                               |  |  |  |  |
|             |                                                  | Experience with similar projects                                                                                                                                 |                                                                                                                               |  |  |  |  |
| <b>E2.2</b> | Construction contractor's experience and ability | Has a good reputation and industry qualifications                                                                                                                |                                                                                                                               |  |  |  |  |
|             |                                                  | Experience with similar projects                                                                                                                                 |                                                                                                                               |  |  |  |  |
| <b>E2.3</b> | Component supplier's experience and ability      | Has a good reputation and industry qualifications                                                                                                                |                                                                                                                               |  |  |  |  |
|             |                                                  | Experience with similar projects                                                                                                                                 |                                                                                                                               |  |  |  |  |
| <b>E2.4</b> | Cooperation willingness                          | Participants established a cooperative relationship based on the contract                                                                                        |                                                                                                                               |  |  |  |  |
|             |                                                  | Participants have long-term cooperation experience and establish strategic partnerships at the enterprise level                                                  |                                                                                                                               |  |  |  |  |
| <b>E2.5</b> | Collaboration channels                           | Use cross-organizational information communication channels, such as BIM, supply chain management platform                                                       |                                                                                                                               |  |  |  |  |
|             |                                                  | Cross-organizational personnel collaboration, such as construction personnel stationed in the component plant, component plant personnel stationed on-site, etc. |                                                                                                                               |  |  |  |  |
| <b>E3.1</b> | Goal setting                                     | Set clear and reasonable project goals according to project characteristics                                                                                      |                                                                                                                               |  |  |  |  |
|             |                                                  | Quantify the target and formulate a measurement and control plan                                                                                                 |                                                                                                                               |  |  |  |  |
|             |                                                  | Set a new technology application plan, such as new construction and installation process application                                                             |                                                                                                                               |  |  |  |  |
| <b>E3.2</b> | Norms and standards                              | Main standards and norms adopted by the project                                                                                                                  | <input type="checkbox"/> National Standard <input type="checkbox"/> Industry Standard <input type="checkbox"/> Local Standard |  |  |  |  |
|             |                                                  | Each participant has established and used enterprise standards (please comprehensively consider each participant)                                                |                                                                                                                               |  |  |  |  |

|             |                  |                                                                                                                                                      |  |  |  |  |  |
|-------------|------------------|------------------------------------------------------------------------------------------------------------------------------------------------------|--|--|--|--|--|
| <b>E3.3</b> | Schedule control | Construction schedule control is standardized, forming a standard operating process and standard management plan                                     |  |  |  |  |  |
|             |                  | Quantify, measure, and track periods of key construction processes, such as recording transportation delay rate and component installation time      |  |  |  |  |  |
|             |                  | Continuously seek the optimization plan of construction schedule control                                                                             |  |  |  |  |  |
|             |                  | Adjustable space is considered and reserved in the schedule                                                                                          |  |  |  |  |  |
| <b>E3.4</b> | Change control   | Change control is standardized, forming standard operating procedures and standard management plans                                                  |  |  |  |  |  |
|             |                  | Quantify, measure, and track the key processes of change control, such as recording the location, number of changes, and engineering volume involved |  |  |  |  |  |
|             |                  | Continuously seek optimization solutions for change control                                                                                          |  |  |  |  |  |
|             |                  | The design drawing is sufficiently detailed and conforms to the actual situation of the component factory and the site                               |  |  |  |  |  |
|             |                  | Owner's needs are determined and maintained in the early stage of the project                                                                        |  |  |  |  |  |
| <b>E3.5</b> | Quality control  | Quality control is Standardized, forming standard operating procedures and standard management plans                                                 |  |  |  |  |  |
|             |                  | Quantify, measure, and track key quality control processes, such as retaining component installation image information, measuring component flatness |  |  |  |  |  |
|             |                  | Continuously seek optimization solutions for quality control                                                                                         |  |  |  |  |  |
|             |                  | Conduct model room testing, identify quality hazards early in the construction phase                                                                 |  |  |  |  |  |
|             |                  | Prepared for the compression of the construction period, and can guarantee the quality when the construction period is compressed                    |  |  |  |  |  |
| <b>E3.6</b> | Cost control     | Cost control is standardized, forming standard operating procedures and standard management plans                                                    |  |  |  |  |  |

|             |                                      |                                                                                                                                                 |  |  |  |  |  |
|-------------|--------------------------------------|-------------------------------------------------------------------------------------------------------------------------------------------------|--|--|--|--|--|
|             |                                      | Quantify, measure, and track key cost control processes, such as statistical analysis of the construction site work to reduce inefficient labor |  |  |  |  |  |
|             |                                      | Continuously seek optimization solutions for cost control                                                                                       |  |  |  |  |  |
|             |                                      | Adopt assembly type special quota                                                                                                               |  |  |  |  |  |
| <b>E4.1</b> | Prefabricated technology system      | Compare and analyze multiple prefabricated systems based on project characteristics                                                             |  |  |  |  |  |
|             |                                      | Identify the key management points and difficulties of the selected technology                                                                  |  |  |  |  |  |
|             |                                      | Comprehensive consideration of room function, available area, price, planning, and other factors                                                |  |  |  |  |  |
| <b>E4.2</b> | Advance work of IC design            | Scheme design, preliminary design consider the later component split                                                                            |  |  |  |  |  |
|             |                                      | Scheme design, preliminary design consider the constraints of later production, transportation, construction, and other links                   |  |  |  |  |  |
| <b>E4.3</b> | Design with component confirmation   | Component design according to the national standard atlas of components                                                                         |  |  |  |  |  |
|             |                                      | In the case of meeting the prefabrication rate, reduce the appearance of heterosexual components and non-standard components                    |  |  |  |  |  |
| <b>E4.4</b> | Detail design and process matching   | Relevant parties can provide timely information in the process of deepening the design                                                          |  |  |  |  |  |
|             |                                      | Result files of the deepening design meet the needs of component automatic production                                                           |  |  |  |  |  |
| <b>E4.5</b> | Component production                 | Automatic production method based on a digital drive                                                                                            |  |  |  |  |  |
|             |                                      | Components such as doors and windows are assembled with the component in advance in the component factory                                       |  |  |  |  |  |
| <b>E4.6</b> | Component transportation             | Carry out simulation or calculation of transportation schemes, such as simulation of vehicle scheduling                                         |  |  |  |  |  |
|             |                                      | Implement measures to protect components during transportation                                                                                  |  |  |  |  |  |
| <b>E4.7</b> | Construction with component assembly | Simulate or test the hoisting and construction plan, such as using BIM software to simulate hoisting                                            |  |  |  |  |  |

|      |                           |                                                                                                                       |  |  |  |  |  |
|------|---------------------------|-----------------------------------------------------------------------------------------------------------------------|--|--|--|--|--|
|      |                           | There are corresponding solutions to the site space constraints, such as the use of multiple hoisting methods         |  |  |  |  |  |
| E4.8 | Industrialized decoration | Apply industrialized interior decoration (if this item is not available, the last two items do not need to be filled) |  |  |  |  |  |
|      |                           | Consider the coordination between the main structure and the interior decoration in the design stage                  |  |  |  |  |  |
|      |                           | Realize the integration of the whole bathroom, whole kitchen and pipeline system                                      |  |  |  |  |  |
| E4.9 | Operation preparation     | Project operational requirements are valued early and prepared during the design phase.                               |  |  |  |  |  |

#### 4. “Results” area

Please tick the option on the right side of the table that best matches the actual situation of the project you are responsible for. Here evaluation scores from 1 to 5 stand for "extremely non-conformity", "unconformity", "uncertain", "reluctantly conformity", and "extremely conformity" respectively.

| Code | Indicators                        | Practical analysis elements                                                                                                                                                              | Your rating                                                                                                                                                             |   |   |   |   |
|------|-----------------------------------|------------------------------------------------------------------------------------------------------------------------------------------------------------------------------------------|-------------------------------------------------------------------------------------------------------------------------------------------------------------------------|---|---|---|---|
|      |                                   |                                                                                                                                                                                          | 1                                                                                                                                                                       | 2 | 3 | 4 | 5 |
| R1.1 | Prefabrication rate               | The average monomer prefabrication rate in the project                                                                                                                                   | <input type="checkbox"/> 20%-30% <input type="checkbox"/> 30%-40%<br><input type="checkbox"/> 40%-50% <input type="checkbox"/> 50%-60%<br><input type="checkbox"/> >60% |   |   |   |   |
| R1.2 | Practical performance             | In the industrial construction projects of the same customer positioning, the room function is better than the average level                                                             |                                                                                                                                                                         |   |   |   |   |
| R1.3 | Operating and maintenance savings | In the industrial construction projects of the same customer positioning, the use cost (modification, electricity, and water) saved by design and performance is better than the average |                                                                                                                                                                         |   |   |   |   |
| R1.4 | Owner's satisfaction              | The owner is very satisfied with the project deliverables (only the deliverables are evaluated)                                                                                          |                                                                                                                                                                         |   |   |   |   |
| R2.1 | Technological innovation          | The project independently developed some patented technologies, which have obvious effects on improving the building construction level and quality and efficiency.                      |                                                                                                                                                                         |   |   |   |   |
| R2.2 | Environmentally friendly          | Among the industrialized residential projects with the same customer positioning, the environmental protection benefits of the four-                                                     |                                                                                                                                                                         |   |   |   |   |

|             |                                                 |                                                                                                                                                                                                   |                                                                                                                                                                                             |  |  |  |  |
|-------------|-------------------------------------------------|---------------------------------------------------------------------------------------------------------------------------------------------------------------------------------------------------|---------------------------------------------------------------------------------------------------------------------------------------------------------------------------------------------|--|--|--|--|
|             |                                                 | section one-project project are better than the average level                                                                                                                                     |                                                                                                                                                                                             |  |  |  |  |
| <b>R2.3</b> | Honors or awards                                | The project won the honors of Innovative Project, Demonstration Project, Magnolia Award, Luban Award, etc.                                                                                        | <input type="checkbox"/> None <input type="checkbox"/> District level <input type="checkbox"/> City level <input type="checkbox"/> Provincial level <input type="checkbox"/> National level |  |  |  |  |
| <b>R3.1</b> | Participants communication efficiency           | Information communication and technical disclosure between project participants are smooth, without information delays and inefficiency. Participants are satisfied with the communication effect |                                                                                                                                                                                             |  |  |  |  |
| <b>R3.2</b> | Participants' long-term cooperation willingness | Participants are satisfied with the cooperation method and the distribution of risks and benefits and are willing to cooperate again with other participants of the project                       |                                                                                                                                                                                             |  |  |  |  |
| <b>R4.1</b> | Schedule                                        | Compared with the planned construction period, the project is completed on time or even ahead of schedule                                                                                         |                                                                                                                                                                                             |  |  |  |  |
|             |                                                 | Compared with the construction period of similar industrialized houses of the same type, the construction period is less than the average level                                                   |                                                                                                                                                                                             |  |  |  |  |
| <b>R4.2</b> | Quality                                         | Compared with the planned quality regulations, the project meets quality standards                                                                                                                |                                                                                                                                                                                             |  |  |  |  |
|             |                                                 | Compared with the quality of similar industrial houses of the same type, the quality level is greater than the average level                                                                      |                                                                                                                                                                                             |  |  |  |  |
| <b>R4.3</b> | Cost                                            | Compared with the planned cost, the project cost is lower                                                                                                                                         |                                                                                                                                                                                             |  |  |  |  |
|             |                                                 | Compared with the cost of similar industrialized buildings of the same type, the project cost is largely below average                                                                            |                                                                                                                                                                                             |  |  |  |  |

Thank you again for your great support for our research!

If you need, you can leave your personal mailbox: \_\_\_\_\_, and we will send the analysis results to you for review after the data analysis is completed. You can also leave your valuable suggestions for our research here:

---



---



---



---

We wish you and your family a very happy life!
